# Supplementary material for: Nitrate retention capacity of milldam-impacted legacy sediments and relict A horizon soils
Source: Copernicus journal article supplement (doi:10.5194/soil-2016-60), 2016-09-22
Supplement: Supplementary file 1 [file soil-2016-60-supplement.pdf]

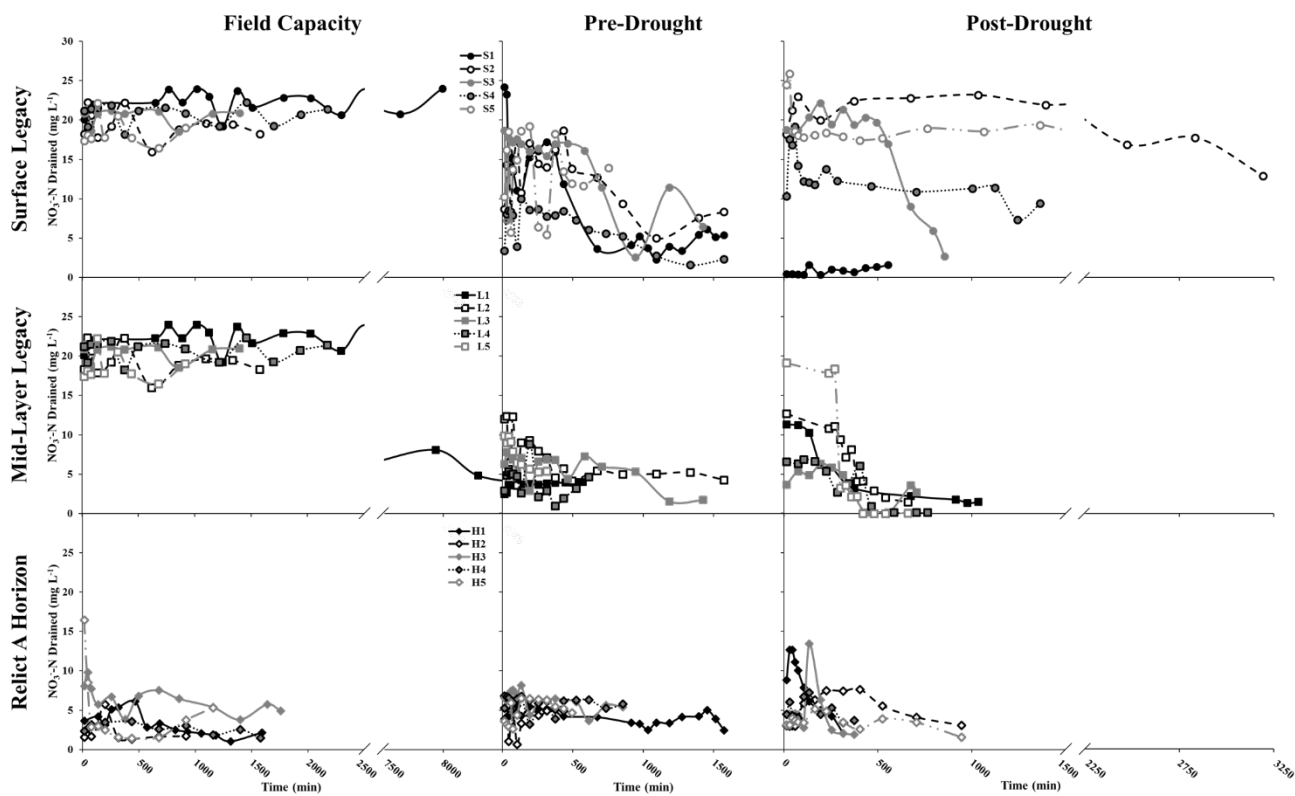

Supplementary Figure S1. Time series release curves depicting the release of leachate NO<sub>3</sub><sup>-</sup> over time for each of the five replicate soil columns from each of the three soil horizons of interest (surface legacy sediment, mid-layer legacy sediment, and relict A horizon soil) during field capacity, pre-drought, and post-drought conditions.
